# Supplementary material for: Chelation-assisted soft-template synthesis of ordered mesoporous zinc oxides for low concentration gas sensing
Source: Royal Society of Chemistry journal article supplement (doi:10.1039/c6ta05687c), 2016-01-01
Supplement: c6ta05687c1.pdf [file c6ta05687c1.pdf]

## Supporting Information

### Chelating-Assisted Soft-Templating Synthesis of Ordered Mesoporous Zinc Oxides for Low Concentration Gas Sensing

Xinran Zhou,<sup>a,†</sup> Yongheng Zhu,<sup>ab,†</sup> Wei Luo,<sup>c</sup> Yuan Ren,<sup>a</sup> Pengcheng Xu,<sup>d</sup> Ahmed A. Elzatahry,<sup>e</sup> Xiaowei Cheng,<sup>a</sup> Abdulaziz Alghamdi,<sup>f</sup> Yonghui Deng<sup>\*ad</sup> and Dongyuan Zhao<sup>a</sup>

<sup>a</sup> Department of Chemistry, State Key Laboratory of Molecular Engineering of Polymers, Shanghai Key Laboratory of Molecular Catalysis and Innovative Materials, State Key Laboratory of ASIC & System, iChEM (Collaborative Innovation Center of Chemistry for Energy Materials), Fudan University, Shanghai 200433, China

<sup>b</sup> College of Food Science and Technology, Shanghai Ocean University, Shanghai 201306, China

<sup>c</sup> College of Materials Science and Engineering, Donghua University, Shanghai 201620, China

<sup>d</sup> State Key Lab of Transducer Technology, Shanghai Institute of Microsystem and Information Technology, Chinese Academy of Sciences, Shanghai 200050, China.

<sup>e</sup> Materials Science and Technology Program, College of Arts and Sciences, Qatar University, PO Box 2713, Doha, Qatar

<sup>f</sup> Department of Chemistry, College of Science, King Saud University, Riyadh 11451, Saudi Arabia

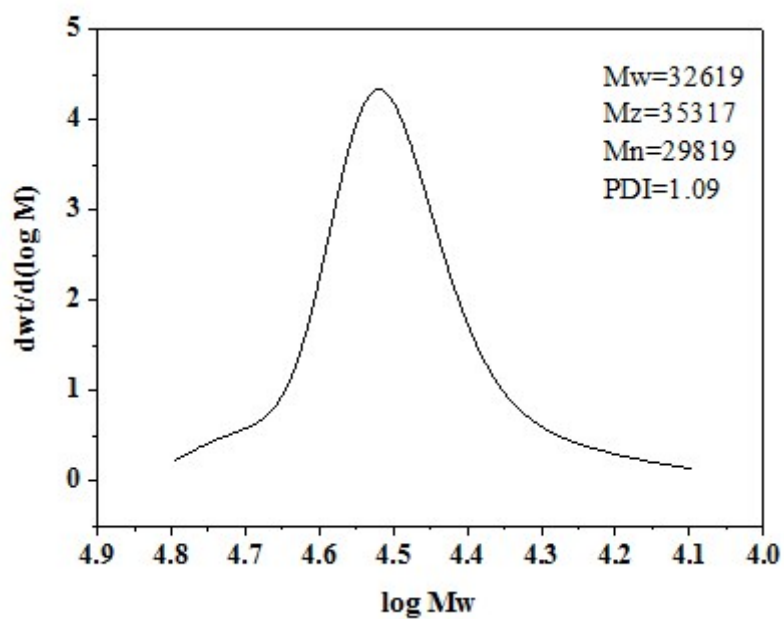

**Figure S1.** The gel permeation chromatograph (GPC) trace of the lab-made PEO-*b*-PS.

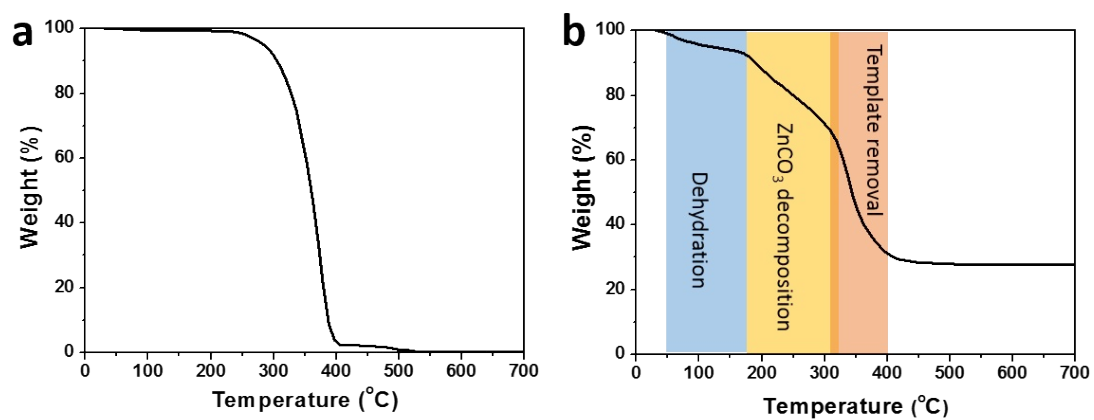

**Figure S2.** The thermogravimetric analysis (TGA) curves of (a) diblock copolymer PEO-*b*-PS template and (b) the PEO-*b*-PS/Zn-100 composites from 25 °C to 700 °C under air with a heating rate of 5 °C min<sup>-1</sup>.

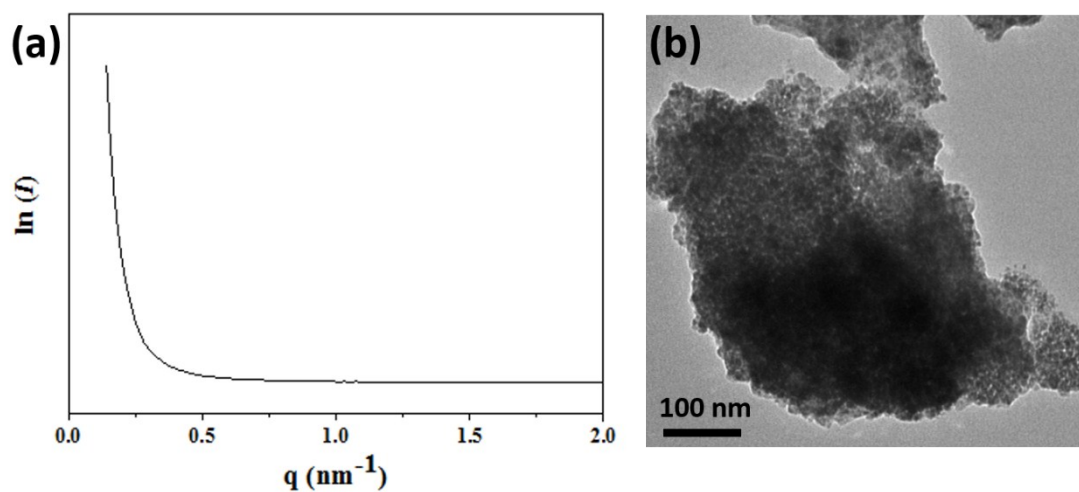

**Figure S3.** (a) SAXS patterns, (b) TEM image of sample without citric acid after the same calcination procedure. No mesoporous structure was formed.

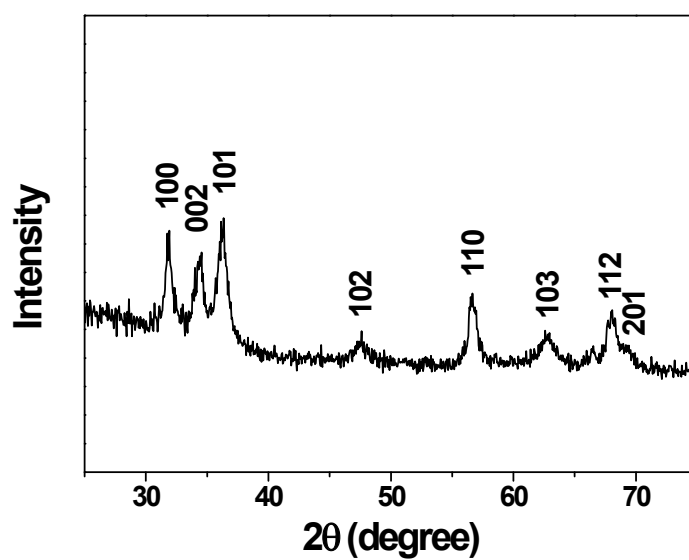

**Figure S4.** XRD patterns of calcined none-mesoporous ZnO.

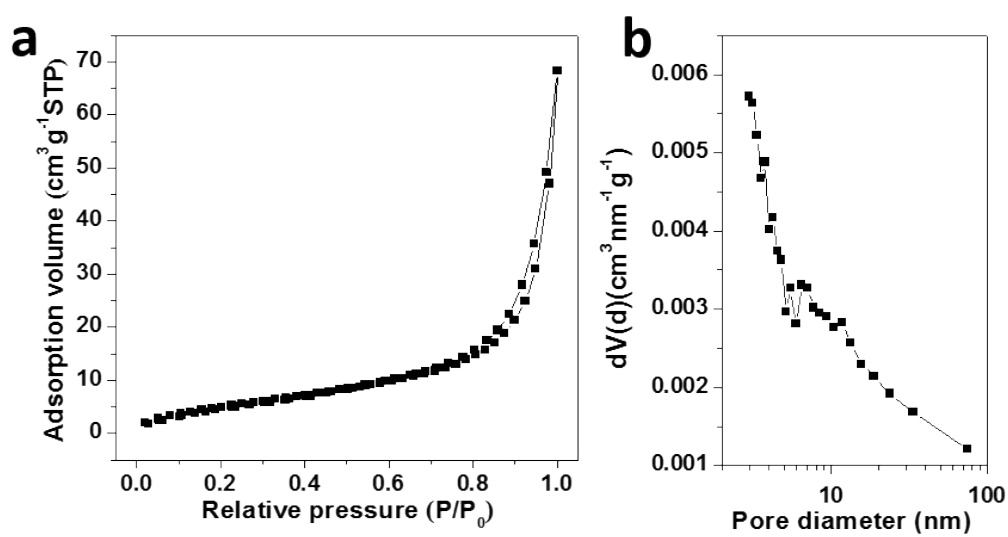

**Figure S5.** (a) Nitrogen-sorption isotherms and (b) pore size distribution curves of calcined non-mesoporous ZnO. The surface area was calculated to be about 15 m<sup>2</sup>/g.

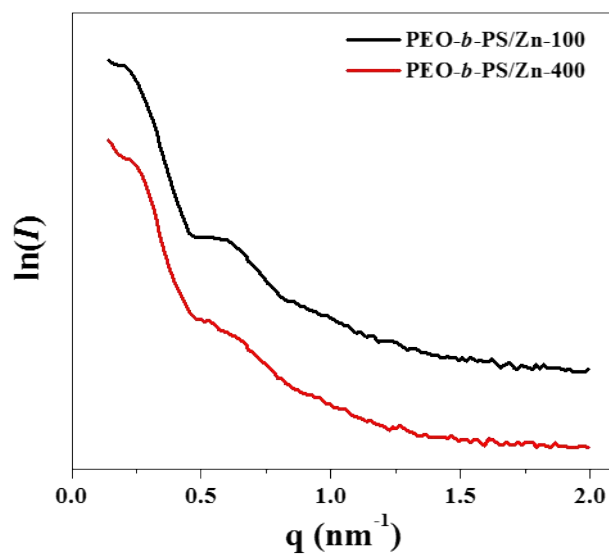

**Figure S6.** SAXS patterns of PEO-*b*-PS/Zn-100 and PEO-*b*-PS/Zn-400.

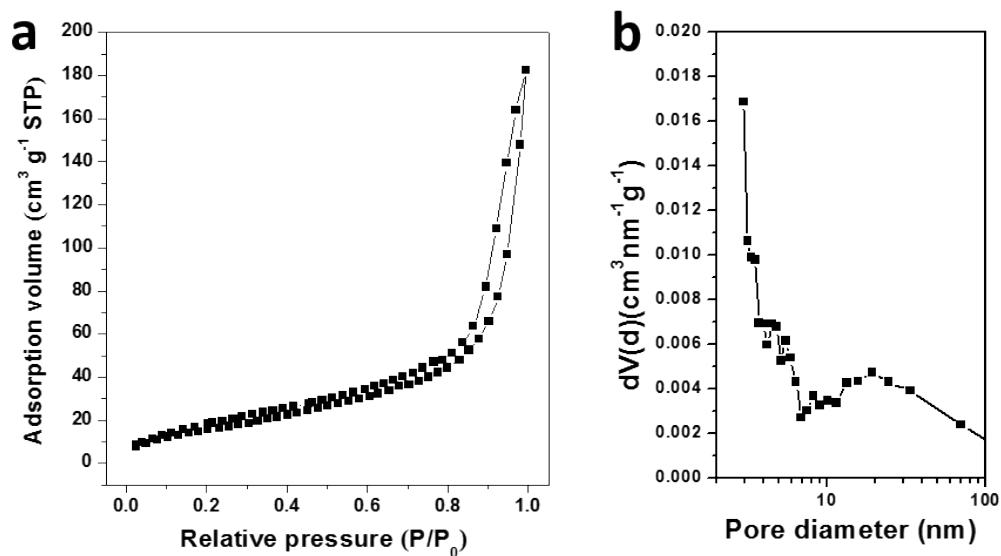

**Figure S7.** (a) Nitrogen-sorption isotherms and (b) pore size distribution of the mesoporous ZnO recycled after gas sensing measurements. The recycled mesoporous ZnO has a BET surface area of 49 m<sup>2</sup>/g, and two sets of mesopores at 3.0 nm and 26.0 nm, respectively, which indicates a well-retained mesoporous structure with a slight structure shrinkage during gas sensing measurement at high temperatures.
